# Supplementary material for: How elevated CO2 affects our nutrition in rice, and how we can deal with it
Source: PubMed Central journal article supplement (PMC6400444; doi:10.1371/journal.pone.0212840), 2019-03-05
Supplement: pone.0212840.s001.pdf [file pone.0212840.s001.pdf]

S1 Table. Countries whose populations received protein from rice in 2011.

| Countries                                                          | Population<br>(in thousands) | Total<br>(g capita <sup>-1</sup> day <sup>-1</sup> ) | % Protein from<br>Rice grain | Rice<br>(g capita <sup>-1</sup> day <sup>-1</sup> ) | Wheat<br>(g capita <sup>-1</sup> day <sup>-1</sup> ) | Protein supply under<br>high CO <sub>2</sub> condition<br>(Brown grain)<br>(g capita <sup>-1</sup> day <sup>-1</sup> ) | Protein supply under<br>high CO <sub>2</sub> condition<br>(Polished grain)<br>(g capita <sup>-1</sup> day <sup>-1</sup> ) | Protein supply from<br>rice and wheat under<br>high CO <sub>2</sub> condition<br>(Brown grain)<br>(g capita <sup>-1</sup> day <sup>-1</sup> ) | Protein supply from<br>rice and wheat under<br>high CO <sub>2</sub> condition<br>(Polished grain)<br>(g capita <sup>-1</sup> day <sup>-1</sup> ) |
|--------------------------------------------------------------------|------------------------------|------------------------------------------------------|------------------------------|-----------------------------------------------------|------------------------------------------------------|------------------------------------------------------------------------------------------------------------------------|---------------------------------------------------------------------------------------------------------------------------|-----------------------------------------------------------------------------------------------------------------------------------------------|--------------------------------------------------------------------------------------------------------------------------------------------------|
| Tajikistan                                                         | 7,814                        | 52.6                                                 | 2.5                          | 1.3                                                 | 28.6                                                 | 52.5                                                                                                                   | 52.4                                                                                                                      | 48.6                                                                                                                                          | 48.6                                                                                                                                             |
| Bangladesh                                                         | 152,804                      | 54.8                                                 | 58.9                         | 32.3                                                | 4.3                                                  | 51.1                                                                                                                   | 50.4                                                                                                                      | 50.5                                                                                                                                          | 49.9                                                                                                                                             |
| Yemen                                                              | 23,299                       | 57.0                                                 | 5.1                          | 2.9                                                 | 27.4                                                 | 56.7                                                                                                                   | 56.6                                                                                                                      | 53.0                                                                                                                                          | 52.9                                                                                                                                             |
| Sierra Leone                                                       | 5,862                        | 56.0                                                 | 31.3                         | 17.5                                                | 2.8                                                  | 54.0                                                                                                                   | 53.6                                                                                                                      | 53.6                                                                                                                                          | 53.3                                                                                                                                             |
| Afghanistan                                                        | 29,086                       | 58.9                                                 | 5.4                          | 3.2                                                 | 37.3                                                 | 58.5                                                                                                                   | 58.5                                                                                                                      | 53.5                                                                                                                                          | 53.4                                                                                                                                             |
| Sri Lanka                                                          | 20,921                       | 59.2                                                 | 33.6                         | 19.9                                                | 8.6                                                  | 56.9                                                                                                                   | 56.5                                                                                                                      | 55.7                                                                                                                                          | 55.3                                                                                                                                             |
| Thailand                                                           | 66,558                       | 58.7                                                 | 33.0                         | 19.4                                                | 2.4                                                  | 56.5                                                                                                                   | 56.1                                                                                                                      | 56.1                                                                                                                                          | 55.8                                                                                                                                             |
| Iraq                                                               | 31,831                       | 61.4                                                 | 9.6                          | 5.9                                                 | 34.8                                                 | 60.7                                                                                                                   | 60.6                                                                                                                      | 56.0                                                                                                                                          | 55.9                                                                                                                                             |
| India                                                              | 1,220,794                    | 60.1                                                 | 22.1                         | 13.3                                                | 14.7                                                 | 58.6                                                                                                                   | 58.3                                                                                                                      | 56.6                                                                                                                                          | 56.3                                                                                                                                             |
| Philippines                                                        | 95,036                       | 60.2                                                 | 33.9                         | 20.4                                                | 3.0                                                  | 57.8                                                                                                                   | 57.4                                                                                                                      | 57.4                                                                                                                                          | 57.0                                                                                                                                             |
| Indonesia                                                          | 243,740                      | 61.1                                                 | 39.6                         | 24.2                                                | 4.5                                                  | 58.3                                                                                                                   | 57.8                                                                                                                      | 57.7                                                                                                                                          | 57.2                                                                                                                                             |
| Laos                                                               | 6,518                        | 63.4                                                 | 53.0                         | 33.6                                                | 0.4                                                  | 59.5                                                                                                                   | 58.9                                                                                                                      | 59.5                                                                                                                                          | 58.8                                                                                                                                             |
| Cambodia                                                           | 14,600                       | 63.2                                                 | 49.1                         | 31.0                                                | 0.5                                                  | 59.6                                                                                                                   | 59.0                                                                                                                      | 59.6                                                                                                                                          | 58.9                                                                                                                                             |
| Pakistan                                                           | 176,099                      | 64.7                                                 | 3.7                          | 2.4                                                 | 23.6                                                 | 64.4                                                                                                                   | 64.4                                                                                                                      | 61.2                                                                                                                                          | 61.2                                                                                                                                             |
| Nepal                                                              | 27,139                       | 66.0                                                 | 24.4                         | 16.1                                                | 10.2                                                 | 64.1                                                                                                                   | 63.8                                                                                                                      | 62.8                                                                                                                                          | 62.4                                                                                                                                             |
| Syrian Arab Republic                                               | 21,809                       | 78.3                                                 | 2.4                          | 1.9                                                 | 35.5                                                 | 78.1                                                                                                                   | 78.0                                                                                                                      | 73.3                                                                                                                                          | 73.2                                                                                                                                             |
| Viet Nam                                                           | 89,901                       | 77.7                                                 | 36.7                         | 28.5                                                | 1.9                                                  | 74.4                                                                                                                   | 73.8                                                                                                                      | 74.2                                                                                                                                          | 73.6                                                                                                                                             |
| Malaysia                                                           | 28,754                       | 79.3                                                 | 16.9                         | 13.4                                                | 10.4                                                 | 77.8                                                                                                                   | 77.5                                                                                                                      | 76.3                                                                                                                                          | 76.1                                                                                                                                             |
| Libya                                                              | 6,102                        | 81.2                                                 | 3.8                          | 3.1                                                 | 32.9                                                 | 80.8                                                                                                                   | 80.8                                                                                                                      | 76.4                                                                                                                                          | 76.3                                                                                                                                             |
| Myanmar                                                            | 52,340                       | 82.0                                                 | 33.4                         | 27.4                                                | 1.2                                                  | 78.8                                                                                                                   | 78.3                                                                                                                      | 78.7                                                                                                                                          | 78.1                                                                                                                                             |
| Jordan                                                             | 6,730                        | 83.8                                                 | 4.7                          | 3.9                                                 | 36.0                                                 | 83.4                                                                                                                   | 83.3                                                                                                                      | 78.5                                                                                                                                          | 78.4                                                                                                                                             |
| Iran (Islamic Rep of)                                              | 75,400                       | 86.5                                                 | 6.2                          | 5.4                                                 | 36.0                                                 | 85.9                                                                                                                   | 85.8                                                                                                                      | 81.0                                                                                                                                          | 80.9                                                                                                                                             |
| Algeria                                                            | 37,757                       | 90.4                                                 | 0.4                          | 0.4                                                 | 42.9                                                 | 90.4                                                                                                                   | 90.3                                                                                                                      | 84.6                                                                                                                                          | 84.5                                                                                                                                             |
| Japan                                                              | 127,271                      | 88.4                                                 | 12.2                         | 10.8                                                | 10.9                                                 | 87.2                                                                                                                   | 86.9                                                                                                                      | 85.7                                                                                                                                          | 85.5                                                                                                                                             |
| Morocco                                                            | 32,051                       | 95.6                                                 | 0.1                          | 0.1                                                 | 42.0                                                 | 95.6                                                                                                                   | 95.6                                                                                                                      | 89.9                                                                                                                                          | 89.9                                                                                                                                             |
| China<br>(Except Hong Kong and Macao)                              | 1,368,340                    | 95.3                                                 | 15.9                         | 15.2                                                | 17.7                                                 | 93.5                                                                                                                   | 93.2                                                                                                                      | 91.2                                                                                                                                          | 90.9                                                                                                                                             |
| Tunisia                                                            | 10,750                       | 98.0                                                 | 0.3                          | 0.3                                                 | 49.3                                                 | 98.0                                                                                                                   | 98.0                                                                                                                      | 91.3                                                                                                                                          | 91.3                                                                                                                                             |
| Egypt                                                              | 79,372                       | 102.5                                                | 7.7                          | 7.9                                                 | 35.4                                                 | 101.6                                                                                                                  | 101.4                                                                                                                     | 96.8                                                                                                                                          | 96.6                                                                                                                                             |
| Total of population that over 50%<br>protein is supplied from Rice | 37,899                       |                                                      |                              |                                                     |                                                      |                                                                                                                        |                                                                                                                           |                                                                                                                                               |                                                                                                                                                  |
| Total of population that over 30%<br>protein is supplied from Rice | 342,765                      |                                                      |                              |                                                     |                                                      |                                                                                                                        |                                                                                                                           |                                                                                                                                               |                                                                                                                                                  |
| Total of population that over 15%<br>protein is supplied from Rice | 494,302                      |                                                      |                              |                                                     |                                                      |                                                                                                                        |                                                                                                                           |                                                                                                                                               |                                                                                                                                                  |

Source: United Nations Food and Agriculture Organization food balance sheets and 2011 United Nations estimated population. ([http://faostat3.fao.org/browse/FB/\\*/\\*](http://faostat3.fao.org/browse/FB/*/*))

Under elevated [CO<sub>2</sub>], countries shown on a red background were estimated the protein supplies at the below level of hunger.

The standard of hunger (52.5g/day) is calculated by the below;

Standard in cal. by WHO/FAO 2,100 kcal per a day (ref. 1)

Standard in protein by UNHCR, UNICEF, WFP and WHO <10% of cal. (ref. 2)

Cal. per protein 4 kcal/g

Reference;

1. Joint WHO/FAO Expert Consultation on Diet, Nutrition and the Prevention of Chronic Diseases (2002)
2. UNHCR, UNICEF, WFP, WHO Food and Nutrition Needs in Emergencies (2002)
