# Supplementary material for: How elevated CO2 affects our nutrition in rice, and how we can deal with it
Source: PubMed Central journal article supplement (PMC6400444; doi:10.1371/journal.pone.0212840), 2019-03-05
Supplement: pone.0212840.s002.pdf [file pone.0212840.s002.pdf]

S2 Table. The mineral content of brown and polished grain in rice (Value per 100g).

|               | Unit | long grain<br>(brown) | long grain<br>(polished) | medium grain<br>(brown) | medium grain<br>(polished) | short grain<br>(brown) | short grain<br>(polished) |
|---------------|------|-----------------------|--------------------------|-------------------------|----------------------------|------------------------|---------------------------|
| Nitrogen, N   | mg   | 7.94                  | 7.13                     | 7.5                     | 6.61                       | 6.8                    | 6.1                       |
| Calcium, Ca   | mg   | 52                    | 28                       | 33                      | 9                          | 9                      | 5                         |
| Iron, Fe      | mg   | 1.48                  | 0.8                      | 1.8                     | 0.8                        | 2.1                    | 0.8                       |
| Magnesium, Mg | mg   | 46                    | 25                       | 143                     | 35                         | 110                    | 23                        |
| Phosphorus, P | mg   | 213                   | 115                      | 264                     | 108                        | 290                    | 94                        |
| Potassium, K  | mg   | 213                   | 115                      | 268                     | 86                         | 230                    | 88                        |
| Sodium, Na    | mg   | 9                     | 5                        | 4                       | 1                          | 1                      | 1                         |
| Zinc, Zn      | mg   | 2.02                  | 1.09                     | 2.02                    | 1.16                       | 1.8                    | 1.4                       |

Source: USDA National Nutrient Database for Standard Reference (long and medium grain rice)  
(<http://ods.od.nih.gov/>)

Standard tables of food composition in Japan, Fifth Revised and Enlarged Edition - 2005 - (short grain rice)  
([http://www.mext.go.jp/b\\_menu/shingi/gijyutu/gijyutu3/toushin/05031802/002/001.pdf](http://www.mext.go.jp/b_menu/shingi/gijyutu/gijyutu3/toushin/05031802/002/001.pdf))
