# Supplementary material for: How elevated CO2 affects our nutrition in rice, and how we can deal with it
Source: PubMed Central journal article supplement (PMC6400444; doi:10.1371/journal.pone.0212840), 2019-03-05
Supplement: pone.0212840.s003.pdf [file pone.0212840.s003.pdf]

S3 Table. The ratio in mineral content between brown and polished grain in rice.

| ratio         | Unit | long grain | medium grain | short grain | Average |
|---------------|------|------------|--------------|-------------|---------|
| Nitrogen, N   | (%)  | 89.8       | 88.1         | 89.7        | 89.2    |
| Calcium, Ca   | (%)  | 53.8       | 27.3         | 55.6        | 45.6    |
| Iron, Fe      | (%)  | 54.1       | 44.4         | 38.1        | 45.5    |
| Magnesium, Mg | (%)  | 54.3       | 24.5         | 20.9        | 33.2    |
| Phosphorus, P | (%)  | 54.0       | 40.9         | 32.4        | 42.4    |
| Potassium, K  | (%)  | 54.0       | 32.1         | 38.3        | 41.4    |
| Sodium, Na    | (%)  | 55.6       | 25.0         | 100.0       | 60.2    |
| Zinc, Zn      | (%)  | 54.0       | 57.4         | 77.8        | 63.1    |

The values indicate the ratio of the mineral content in polished grain to content in brown grain (=100).
