# Supplementary material for: How elevated CO2 affects our nutrition in rice, and how we can deal with it
Source: PubMed Central journal article supplement (PMC6400444; doi:10.1371/journal.pone.0212840), 2019-03-05
Supplement: pone.0212840.s004.pdf [file pone.0212840.s004.pdf]

S4 Table. Analysis of elevated CO<sub>2</sub> effects on elemental contents in leaf vegetables.

| Plant species                                   | Plant type     | S      | K      | Ca     | P      | Mg     | Zn     | Fe     | Mn     | Cu     | Reference            |
|-------------------------------------------------|----------------|--------|--------|--------|--------|--------|--------|--------|--------|--------|----------------------|
| <i>B. rapa</i> var. <i>previridis</i> (rakuten) | C <sub>3</sub> | 101.79 | 92.10  | 84.37  | 78.20  | 85.91  | 101.37 | 91.51  | 82.46  | 87.89  | new data             |
| <i>B. rapa</i> var. <i>previridis</i> (kahoku)  | C <sub>3</sub> | 105.73 | 92.17  | 67.36  | 76.85  | 83.52  | 87.82  | 86.95  | 62.58  | 90.33  | new data             |
| <i>B. rapa</i> var. <i>chinensis</i>            | C <sub>3</sub> | 134.63 | 90.51  | 63.52  | 92.63  | 75.03  | 89.43  | 87.70  | 86.54  | 91.57  | new data             |
| <i>B. oleracea</i> var. <i>capitata</i>         | C <sub>3</sub> | 92.72  | 108.78 | 76.12  | 94.86  | 92.35  | 101.85 | 91.08  | 92.12  | 55.54  | new data             |
| <i>Beta vulgaris</i> var. <i>cilia</i>          | C <sub>3</sub> | 108.72 | 95.89  | 72.84  | 85.64  | 84.20  | 95.12  | 89.31  | 80.93  | 81.34  | new data             |
| <i>Apium graveolens</i> var. <i>dulce</i>       | C <sub>3</sub> | ND     | 91.52  | 97.66  | 94.21  | 90.00  | ND     | ND     | ND     | ND     | Tremblay et al, 1988 |
| <i>B. oleracea</i> var. <i>alboglabra</i>       | C <sub>3</sub> | 95.29  | ND     | ND     | ND     | ND     | ND     | ND     | ND     | ND     | La et al., 2009      |
| <i>Spinacia oleracea</i>                        | C <sub>3</sub> | ND     | ND     | 104.12 | ND     | 39.29  | ND     | 44.62  | ND     | ND     | Jain et al., 2007    |
| Ave.                                            |                | 106.48 | 95.16  | 80.86  | 87.07  | 78.61  | 95.12  | 81.86  | 80.93  | 81.34  |                      |
| P value (ZTEST)                                 |                | 0.2920 | 0.0867 | 0.0009 | 0.0001 | 0.0019 | 0.0943 | 0.0154 | 0.0001 | 0.0052 |                      |
|                                                 |                |        |        | ***    | ***    | **     |        | *      | ***    | **     |                      |

ND means no data. \*\*\*, \*\*, \* Significant at  $P < 0.001, 0.01, 0.05$

In plant species, B. means Brassica.

Reference;

- Jain, V., Pal, M., Raj, A. and Khetarpal, S. Photosynthesis and nutrient composition of spinach and fenugreek grown under elevated carbon dioxide concentration. *Biol. Plant* 51, 559–562 (2007).
- La, G.X., Fang, P., Teng, Y.B., Li, Y.J. and Lin, X.Y. Effect of CO<sub>2</sub> enrichment on the glucosinolate contents under different nitrogen levels in bolting stem of Chinese kale (*Brassica alboglabra* L.) *J. Zhejiang Univ. Sci. B* 10, 454–464 (2009).
- Tremblay, N., Yelle, S. and Gosselin, A. Effects of CO<sub>2</sub> enrichment, nitrogen and phosphorus fertilization during the nursery period on mineral composition of celery. *J. Plant Nutr.* 11, 37–49 (1988).
