# Supplementary material for: How elevated CO2 affects our nutrition in rice, and how we can deal with it
Source: PubMed Central journal article supplement (PMC6400444; doi:10.1371/journal.pone.0212840), 2019-03-05
Supplement: pone.0212840.s005.pdf [file pone.0212840.s005.pdf]

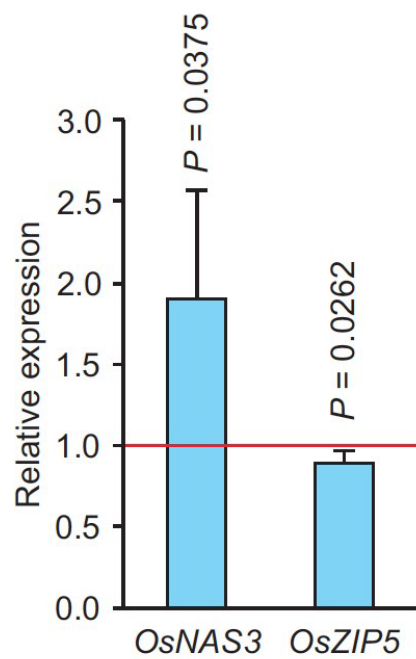

**S1 Fig. Expression change of *OsNAS3* (Os07g0689600) and *OsZIP5* (Os05g0472700) under elevated [CO<sub>2</sub>] condition relative to ambient [CO<sub>2</sub>]. *Actin* (*Act1*) was used as the control. Data are presented as mean  $\pm$  s.d. (n = 3). Student's t-tests were used to calculate P values.**
