# Supplementary material for: How elevated CO2 affects our nutrition in rice, and how we can deal with it
Source: PubMed Central journal article supplement (PMC6400444; doi:10.1371/journal.pone.0212840), 2019-03-05
Supplement: pone.0212840.s006.pdf [file pone.0212840.s006.pdf]

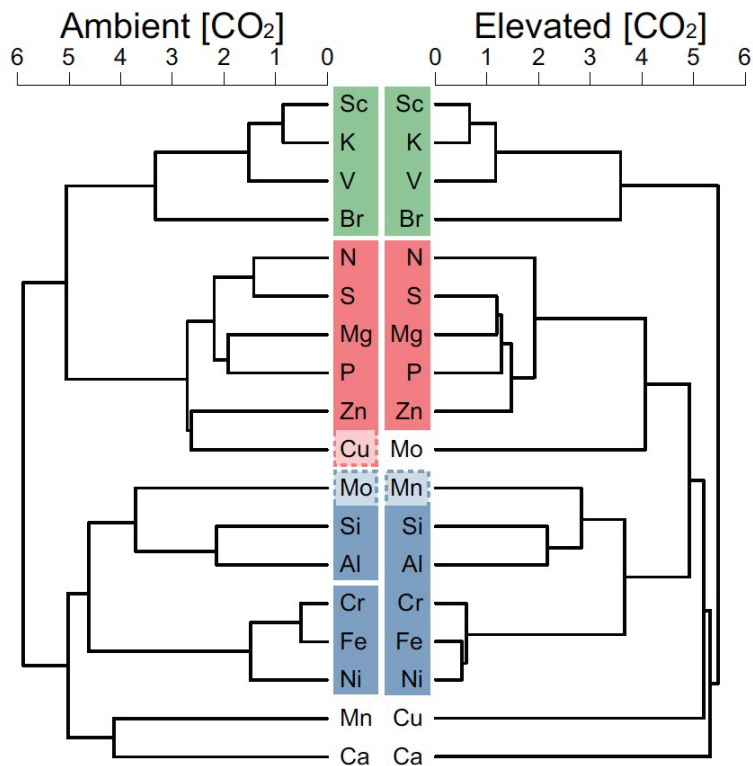

**S2 Fig. Dendrogram for elemental flows in elevated [CO<sub>2</sub>] and ambient [CO<sub>2</sub>].** The tree were estimated from the elemental flows between plant parts in “Koshihikari”. Hierarchic clustering was calculated by group average method based on Euclidean distance.
